# Supplementary material for: SMARCA2-deficiency confers sensitivity to targeted inhibition of SMARCA4 in esophageal squamous cell carcinoma cell lines
Source: Sci Rep. 2019 Aug 12;9:11661. doi: 10.1038/s41598-019-48152-x (PMC6691015; doi:10.1038/s41598-019-48152-x)
Supplement: Supplementary file 3 — Dataset 2 [file 41598_2019_48152_MOESM3_ESM.xlsx]

## Sheet: Tabelle1
	Cell Lines
Gene symbol	KYSE-270	T.T	KYSE-30	KYSE-410	KYSE-510	COLO-680N	KYSE-150	KYSE-70	KYSE-140	KYSE-450
ACAT1	-0.003	-0.843	-0.015	-0.02	-0.018	-0.004	-0.011	-0.033	-0.007	-0.005
ASH1L	-0.272	-0.834	-1.192	-0.223	-1.933	-0.41	-1.149	-0.573	-0.467	-0.199
ATAD2	-0.938	-0.064	-1.178	-0.323	-1.395	-1.577	-0.242	-1.178	-0.099	-0.543
ATAD2B	-0.001	-0.067	-0.027	-0.496	-0.013	-0.068	-0.286	-0.029	-0.038	-0.048
ATAT1	-0.616	0	-0.826	-0.536	-0.543	-0.154	-2.004	-0.997	-0.083	-1.142
ATF2	-0.137	-0.125	-0.216	-0.419	-0.396	-0.35	-0.478	-0.411	-0.105	-0.402
ATRX	-0.207	-0.848	-2.79	-0.529	-0.562	-0.367	-0.957	-2.076	-0.906	-0.123
BAZ1A	-0.147	-0.24	-0.25	-0.368	-0.278	-0.478	-0.012	-0.09	-0.809	-0.038
BAZ1B	-2.535	-1.864	-1.932	-3.072	-1.025	-1.33	-2.999	-1.058	-2.509	-1.073
BAZ2A	-0.147	-0.233	-0.756	-0.097	-0.011	-0.003	-0.96	-0.644	-0.359	-0.85
BAZ2B	-0.002	-0.01	-0.012	-0.265	-0.079	-0.584	-0.023	-0.006	-0.02	-0.102
BPTF	-0.415	-0.815	-0.919	-0.314	-0.827	-2.484	-1.993	-1.438	-1.359	-1.784
BRD1	-0.419	-0.005	-0.439	-2.158	-0.764	-0.296	-0.136	-1.014	-0.084	-1.256
BRD2	-5.107	-3.585	-6.499	-5.56	-2.895	-3.388	0	-0.677	-1.207	-6.602
BRD3	-0.024	-0.597	-2.037	-0.328	-0.176	-0.512	-0.541	-0.582	0	-0.301
BRD4	-8.837	-6.992	-5.802	-7.376	-6.403	-6.625	-8.419	-6.388	-10.511	-9.624
BRD8	-3.744	-2.881	-1.672	-0.963	-2.563	-2.543	-2.167	-0.906	-3.28	-2.397
BRD9	-0.017	-0.094	-0.444	-1.401	-1.263	-0.032	-2.084	-0.009	-0.441	-0.188
BRDT	-0.528	-0.003	-0.117	-0.128	-0.073	-1.08	-0.373	0	-0.212	-0.028
BRPF1	-0.303	-0.58	-0.49	-1.057	-1.084	-0.244	-1.174	-0.365	-0.502	-0.227
BRPF3	-0.512	-0.049	-0.018	-0.132	-0.022	-0.055	-0.49	-0.004	-0.037	-0.014
BRWD1	-0.017	-0.021	-0.013	-0.045	-0.016	-0.004	-0.002	-0.035	-0.001	0
BRWD3	0	-0.009	-0.002	-0.079	0	-0.187	0	-0.035	0	-0.002
CARM1	-1.889	-1.541	-0.753	-0.31	-1.409	-0.459	-0.433	-2.089	-2.665	-1.601
CDK1	-2.59	-1.645	-2.119	-2.002	-2.293	-3.093	-2.484	-2.172	-2.779	-2.501
CDK9	-3.135	-3.885	-2.076	-1.921	-3.201	-4.661	-4.004	-4.172	-4.79	-3.818
CECR2	-0.002	-0.077	-0.05	-0.83	-0.084	-0.256	-0.674	-0.302	-0.161	-0.066
­­CHD1	-1.384	-0.192	-0.602	-0.392	-0.612	-0.118	-1.684	-0.025	-0.606	-0.967
CHD1L	-0.602	-3.012	-1.432	-0.401	-0.768	-0.471	-0.158	-0.404	-1.611	-0.255
CHD2	-0.389	-0.818	-0.005	-0.07	-1.601	-0.012	-1.557	-0.216	-0.127	-0.216
CHD3	-0.003	-0.001	-0.045	-0.662	-0.451	-0.504	-0.003	0	-0.064	-0.09
CHD4	-3.295	-2.314	-1.649	-2.91	-3.573	-3.851	-5.017	-3.842	-4.116	-4.279
CHD5	-0.24	-0.341	-0.055	-0.284	-0.452	-0.267	-0.167	-0.183	-0.226	-0.164
CHD6	-0.023	-0.036	-0.21	-0.306	-0.152	-0.339	-1.257	-0.021	-0.408	-0.029
CHD7	-0.145	-0.008	-0.089	-0.016	-0.005	-1.342	-0.25	-0.003	-0.057	-0.042
CHD8	-1.629	-1.314	-1.314	-2.358	-2.324	-0.937	-1.843	-0.802	-2.399	-2.569
CHD9	-0.08	-0.069	-0.213	-0.028	-0.009	-0.715	-0.169	-0.178	-0.126	-0.01
CLOCK	-0.007	-0.188	-0.084	-0.003	-0.142	-0.309	-0.118	-0.001	-0.007	-0.004
CREBBP	0	-1.247	-2.782	-0.038	-0.04	-0.24	-0.112	0	-0.013	0
DOT1L	-4.878	-4.189	-0.886	-1.879	-0.498	-0.537	-0.99	-2.881	-0.019	-0.595
EHMT1	-0.004	-3.178	-1.554	-0.981	-3.021	-0.57	-0.74	-2.808	-5.168	-2.546
EHMT2	-1.189	-3.732	-1.8	-1.089	-2.981	-0.891	-1.157	-2.063	-5.097	-3.402
ELP3	-4.432	-5.243	-4.329	-4.943	-5.205	-5.182	-5.145	-5.158	-6.331	-5.243
EP300	-1.886	-6.65	-0.52	-2.531	-0.2	-4.735	-2.349	-7.164	0	-7.846
EP400	-2.885	-2.722	-2.82	-1.195	-2.185	-2.043	-3.755	-2.121	-3.737	-2.831
ERCC6	-0.231	-0.205	-1.206	-0.192	-0.35	-0.791	-0.404	-0.009	-0.005	-0.228
EZH1	-1.071	-0.258	-0.509	-0.249	-0.284	-0.905	-0.061	-0.185	-0.481	-0.273
EZH2	0	-0.169	-0.041	-0.211	-1.477	-2.303	-0.027	-1.64	-0.01	-0.018
GTF3C4	-4.926	-4.134	-3.22	-4.517	-4.901	-2.041	-5.428	-3.175	-6.13	-5.323
HAT1	-0.011	-0.215	-0.008	-0.218	-1.099	-0.349	-0.323	-0.022	-0.001	-0.401
HDAC1	-2.008	-2.651	-2.874	-0.123	-0.211	-0.676	-1.814	-2.018	-1.163	-1.054
HDAC10|MAPK12	-0.003	-0.004	-0.152	-0.123	-0.136	-0.203	-0.043	-0.428	-0.018	-0.07
HDAC11	-0.33	-0.232	-0.963	-0.663	-0.76	-0.603	-0.066	-0.034	-0.138	-0.614
HDAC2	-0.016	-0.156	-0.464	-0.764	-0.337	-0.116	-0.229	-0.752	-0.227	-0.13
HDAC3	-1.752	-4.714	-4.292	-5.68	-2.966	-3.342	-4.279	-5.555	-4.868	-3.922
HDAC4	-0.014	-0.367	-0.286	-0.342	0	-0.004	0	-0.091	-0.017	-0.001
HDAC5	-0.047	-0.501	-0.14	-0.212	-0.148	-1.58	-0.243	-0.483	-0.436	-0.614
HDAC6	-0.567	-1.21	-0.128	-0.132	-0.095	-0.137	-1.995	-0.94	-0.055	-0.204
HDAC7	-1.152	-0.574	-0.571	-0.476	-0.045	-0.494	-1.39	-3.121	-0.535	-0.633
HDAC8	-0.655	-1.405	-0.617	-0.221	-0.209	-0.01	-0.305	-0.831	-3.524	-0.032
HDAC9	-0.163	-0.002	-0.239	-0.014	-0.009	-0.01	-0.312	-0.003	-0.136	-0.001
HELLS	-0.06	-0.042	-0.403	-0.001	-0.166	-0.01	-0.215	-0.766	-0.039	-0.102
HIF1AN	-1.02	-0.737	-0.757	-0.507	-0.692	-0.872	-0.891	-1.34	-0.288	-0.768
HLTF	-0.13	-0.064	-0.009	-0.162	-0.236	-0.392	-0.014	-0.07	-0.015	-0.12
HR	-0.108	-0.051	-0.089	-0.315	-0.029	-0.084	-0.005	-1.057	-0.286	-0.153
HSPBAP1	-0.003	-0.021	0	-0.152	-0.015	-0.174	-0.173	-0.042	-0.003	0
INO80	-3.391	-2.889	-3.617	-3.234	-2.828	-2.981	-4.891	-3.983	-4.55	-3.964
JARID2	-0.684	-0.065	-0.064	-0.415	-0.268	-0.226	-0.09	-0.001	-0.005	-0.196
JMJD1C	-0.001	-0.002	-0.011	-0.036	-0.019	-0.005	-0.002	-0.062	-0.027	-0.001
JMJD6	-1.826	-1.202	-1.441	-0.878	-1.269	-1.297	-1.283	-1.077	-1.759	-0.874
JMJD7|JMJD7-PLA2G4B	-0.786	-0.009	-0.512	-0.525	-0.71	-0.397	-0.954	-0.695	-0.44	-0.661
KAT2A	-3.733	-3.411	-1.796	-3.032	-5.078	-4.39	-2.395	-4.307	-3.502	-1.577
KAT2B	-0.003	-0.075	-0.046	-0.079	0	-0.048	0	-0.001	-0.004	-0.091
KAT5|RNASEH2C	-3.962	-2.946	-2.159	-4.002	-3.316	-3.658	-4.27	-4.145	-4.356	-4.642
KAT6A	-0.018	-0.115	-0.41	-0.069	-0.645	-0.153	-0.573	0	-0.65	-0.755
KAT6B	-0.18	-0.227	-0.115	-0.272	-0.035	-0.401	-0.444	-0.018	-0.004	-0.13
KAT7	-0.403	-1.093	-1.218	-1.671	-2.499	-1.572	-1.802	-3.369	-1.098	-1.59
KAT8	-2.805	-2.555	-2.586	-3.535	-3.291	-1.673	-3.367	-3.134	-3.702	-3.754
KDM1A	-2.836	-3.127	-2.885	-5.163	-4.051	-0.825	-1.314	-1.062	-0.848	-2.748
KDM1B	-0.226	-0.002	-0.184	-0.001	0	-0.199	-0.17	0	-0.012	-0.001
KDM2A	-0.087	-3.58	-1.433	-2.349	-1.965	-0.518	-0.055	-0.105	-1.854	-1.767
KDM2B	-0.265	-1.463	-0.333	-1.934	-1.228	-0.081	-0.874	-0.162	-0.698	-1.283
KDM3A	-0.687	-0.392	-0.037	-0.954	-0.258	-0.167	-0.011	-0.101	-0.037	-0.105
KDM3B	-1.976	-2.48	-1.89	-1.881	-1.809	-0.95	-2.671	-2.138	-2.191	-1.465
KDM4A	-2.746	-0.714	-0.699	-0.175	-0.019	-0.045	-0.085	-1.577	-1.281	-0.86
KDM4B	-0.362	-0.582	-0.028	-0.091	-0.28	-0.492	-0.166	-0.625	-0.035	-0.449
KDM4C	0	-0.271	-0.243	-0.088	-0.149	-0.108	-5.411	-0.097	-0.001	-0.203
KDM4D	-0.009	-0.38	-0.642	-0.004	-0.186	-1.343	-0.083	-0.069	-0.895	-0.28
KDM5A	-0.065	-0.198	-0.199	-0.028	-0.06	-0.001	-0.287	-0.006	-0.815	-1.157
KDM5B	-0.178	-0.936	-0.404	-1.023	-0.64	-0.086	-0.437	-0.003	-0.205	-0.637
KDM5C	-0.051	-0.002	-0.045	-0.254	-0.26	-0.007	-0.505	-0.045	-0.028	-0.002
KDM5D	-0.005	-0.108	-0.011	-0.028	-0.01	-0.177	0	-0.008	-0.108	-0.004
KDM6A	-0.397	-0.238	-0.884	-0.004	-0.716	-0.61	-0.003	-1.259	-0.011	-0.862
KDM6B	-0.476	-0.233	-0.555	-0.187	-0.295	-1.977	-0.458	-0.055	-0.574	-0.535
KDM7A	-0.05	-0.001	-0.303	-0.428	-0.045	-0.778	-0.125	-0.166	-0.037	-0.021
KDM8	-4.028	-3.78	-2.621	-3.844	-3.968	-2.762	-4.243	-4.741	-4.739	-5.169
KMT2A	-0.475	-0.025	-0.299	-0.638	-0.201	-0.05	-0.227	-2.535	-0.043	-0.168
KMT2B|IGFLR1	-0.725	-2.612	-0.738	-1.904	-2.847	-1.428	-0.324	-0.742	-1.928	-1
KMT2C	-0.029	-0.037	-0.482	-0.026	-0.241	-1.118	0	-0.648	-0.023	-1.877
KMT2D	-1.805	-1.228	-1.311	-0.384	-0.569	-1.691	-0.968	-2.831	-1.449	-1.076
KMT2E	0	-0.065	-0.428	-0.694	-0.067	-0.047	0	-0.402	-0.259	-1.174
KMT5A	-2.507	-2.397	-2.289	-3.259	-2.496	-1.809	-2.562	-2.671	-3.226	-2.63
KMT5B	-0.814	-2.77	-1.297	-0.035	-0.723	-0.344	-0.035	-0.19	-1.563	-0.07
KMT5C	-0.162	-0.005	-0.02	-0.453	-3.207	-0.067	-0.081	-0.07	-0.031	-0.1
NAT10	-2.26	-2.1	-1.785	-2.11	-1.893	-1.795	-2.874	-2.516	-3.516	-2.445
NCOA1	-0.381	-0.109	-0.209	-0.51	-0.663	-0.217	-0.359	-0.008	-0.077	-0.374
NCOA2	-0.022	-0.002	-0.08	-0.646	-0.524	-0.529	-0.605	-0.068	-0.003	-0.08
NCOA3	-0.578	-0.532	-0.741	-2.576	-0.401	-0.655	-0.416	-0.463	-0.545	-0.097
NEG_CONTR	0	0	0	-0.008	-0.017	0	0	0	0	0
NSD1	-0.979	-1.998	-5.045	-2.751	-3.817	-2.697	-4.743	-2.17	-3.123	-3.573
NSD2	-0.635	-0.569	-0.005	-0.924	-2.289	-0.049	-0.657	-1.932	-1.048	-0.583
NSD3	-0.007	0	-0.461	-0.011	-0.048	-0.453	-0.013	-0.009	-0.366	-0.402
PADI4	-0.171	-0.08	-0.291	-0.897	-0.047	-0.37	-0.566	-0.726	-0.246	-0.138
PBRM1	-0.725	-2.828	-1.495	-0.232	-0.569	-0.786	-0.005	-2.766	-0.475	-0.06
PCNA	-1.919	-1.433	-1.355	-1.007	-1.848	-1.755	-2.247	-1.781	-2.208	-2.28
PHF2	-0.247	-0.124	-1.222	-0.462	-0.246	-1.94	-1.387	-0.002	-1.397	-0.222
PHF8	-0.019	-0.043	-0.02	-0.173	-0.282	-0.01	-0.004	-0.304	-0.001	-0.383
PHIP	-2.422	-0.02	-0.303	-0.068	-0.111	-0.105	-0.203	-0.233	-0.037	-2.125
POLR2A	-1.417	-3.624	-2.717	-2.604	-3.88	-1.728	-4.307	-4.354	-4.577	-3.53
PRDM2	-0.023	-0.492	-0.356	-0.006	-1.561	-0.148	-0.15	-0.206	-0.102	-0.019
PRDM8	-0.313	-0.275	-0.677	-0.248	-0.032	-0.223	-0.302	-0.064	-0.072	-0.33
PRDM9	-0.16	-0.031	-0.02	-0.308	-0.297	-0.998	-0.08	-0.899	-0.267	-0.003
PRMT1	-2.082	-2.148	-2.055	-1.098	-2.198	-2.282	-2.471	-2.508	-2.856	-3.316
PRMT2	-0.722	-0.217	-0.954	-0.277	-0.555	-0.647	-0.019	-0.591	-0.443	-1.227
PRMT3	-0.174	-0.072	-0.129	-0.008	-0.207	-0.032	-0.124	-0.455	-0.001	-0.023
PRMT5	-3.618	-3.376	-1.276	-4.929	-4.824	-3.768	-5.063	-4.537	-5.017	-5.704
PRMT7	-0.997	-1.391	-2.587	-0.539	-0.011	-2.039	-1.104	-2.316	-1.355	-0.764
PRMT8	-0.034	-0.02	-0.161	-0.214	-0.3	-0.166	-0.092	-0.002	-0.003	-0.003
PRMT9	-0.068	-0.535	-0.01	-0.296	-1.968	-0.757	-0.217	-0.799	-0.367	-0.107
RAD54L2	-1.527	-0.684	-0.676	-0.046	0	-1.826	-0.329	-0.024	-2.434	-0.457
RIOX1|HEATR4	-0.525	-0.025	-0.35	-0.015	-0.395	-0.289	-0.5	-0.365	-0.155	-0.374
RIOX2	-0.004	-0.013	-0.005	-0.373	-0.116	-0.024	-0.112	-0.183	-0.137	-0.921
RPA3	-2.629	-1.919	-2.529	-2.91	-2.713	-1.587	-3.07	-1.816	-3.055	-3.328
RPL23A	-1.825	-2.2	-1.48	-1.331	-1.639	-1.352	-1.639	-1.5	-1.792	-1.888
RPL9	-3.234	-2.284	-2.004	-3.07	-2.852	-2.872	-3.242	-2.775	-3.371	-3.692
SETD1A	-4.275	-2.824	-2.456	-2.035	-0.009	-1.494	-4.257	-2.198	-3.788	-2.605
SETD1B	-6.903	-1.039	-2.659	-3.035	-5.593	-0.65	-4.309	-1.52	-0.388	-6.075
SETD2	-2.463	-3.6	-3.012	-3.711	-1.602	-2.853	-2.975	-2.934	-3.557	-1.849
SETD4	-0.187	-0.08	-0.302	-0.232	-0.345	-0.052	-0.484	-0.006	-0.257	-0.01
SETD5	-0.002	-0.12	-0.08	-0.461	-0.407	-0.589	-0.01	-0.206	-0.016	-0.388
SETD6	-0.234	-0.144	-0.035	-0.371	-1.478	-0.818	-0.843	-0.051	-0.17	-0.233
SETD7	-0.83	-0.136	-0.721	-0.05	-0.615	-0.418	-0.216	-0.161	-0.276	-0.273
SETDB1|CERS2	-2.353	-3.497	-1.874	-0.503	-2.343	-2.408	-1.468	-3.448	-2.854	-0.063
SETDB2	-0.005	-0.184	-0.216	-0.027	-0.013	-0.003	-0.005	-2.008	-0.008	-0.188
SETMAR	-0.004	-0.012	-0.001	-0.229	-0.031	-0.009	-0.032	-0.585	-0.008	-0.056
SHPRH	-0.227	-0.311	-0.495	-0.689	-0.727	-0.245	-0.344	-0.413	-0.512	-0.187
SIRT1	-0.586	-0.008	-1.54	-0.007	-0.004	-0.132	-1.587	-0.439	0	-0.357
SIRT2	-0.02	-0.311	-0.16	-1.62	-0.105	-1.858	-0.221	-0.221	-0.45	-0.156
SIRT3	-0.049	-0.134	-0.031	-0.24	-0.18	-0.003	-0.016	-0.175	-0.006	-0.016
SIRT4	-0.864	-0.208	-0.614	-0.58	-0.232	-0.465	-0.229	-0.601	-0.135	-0.473
SIRT5	-0.018	-0.193	-0.798	-0.812	-0.339	-0.328	-0.057	-0.004	-0.08	-0.254
SIRT6	-1.279	-1.586	-1.16	-0.686	-0.61	-0.207	-0.273	-0.774	-2.051	-1.533
SIRT7	-0.079	-0.655	-1.239	-0.519	-0.025	-0.308	-0.012	-0.058	-0.862	-0.264
SMARCA2	-0.176	-0.593	-0.111	-0.497	-0.859	-0.232	-0.114	-0.674	-0.289	-0.468
SMARCA4	-4.503	-4.499	-3.724	-3.108	-3.397	-1.322	-1.64	-1.215	-1.31	-0.489
SMARCAD1	-0.04	-0.011	-0.137	-0.107	-0.368	-0.813	-0.01	-0.002	-0.001	-0.332
SMARCAL1	-0.378	-0.009	-0.266	-0.403	-0.023	-0.734	-0.137	-0.059	-0.152	-0.585
SMYD1	-0.023	-0.544	-0.086	-0.058	-0.041	-0.611	-0.312	-0.078	-0.054	-0.013
SMYD3	-0.001	-0.738	-0.111	-0.202	-0.166	-0.281	-0.525	-0.248	-0.005	-0.083
SMYD4	-0.012	-0.008	-0.183	-0.305	-0.195	-0.326	-0.197	-0.039	-0.024	-0.033
SMYD5	-0.283	-0.011	-0.013	-0.066	-0.009	-0.018	-0.088	-0.142	-0.019	-0.192
SNAP47|JMJD4	-1.202	-1	-1.351	-1.113	-1.463	-0.16	-0.131	-0.539	-0.343	-0.765
SP100	-0.036	-0.069	-0.034	-0.019	-0.001	-0.096	-0.218	-0.033	-0.061	-0.042
SRCAP	-1.859	-2.275	-0.514	-1.81	-3.398	-3.842	-2.993	-2.686	-3.419	-3.315
STUB1|JMJD8	-0.192	-0.1	-0.162	-0.211	-1.582	-0.064	-0.091	-0.075	-0.315	-0.139
SUV39H1	-1.046	-0.093	-0.123	-0.234	-0.196	-0.167	-0.05	-0.496	-0.018	-0.108
SUV39H2	-0.104	-0.007	-0.092	-0.075	-0.092	-0.089	-0.227	-0.2	-0.032	-0.698
TAF1	-2.143	-2.875	-2.043	-2.467	-6.026	-3.06	-3.419	-4.009	-6.138	-3.76
TET1	-0.059	-0.002	-0.003	-0.098	-0.001	-0.071	-0.083	-0.007	-0.026	-0.011
TET2	-0.003	0	-0.045	-0.018	-0.288	-0.14	-0.017	0	-0.022	-0.006
TET3	-0.745	-0.815	-0.491	-0.583	-0.328	-0.076	-1.192	-0.735	-1.531	-2.386
TRIM24	-0.001	-0.056	-0.004	-0.003	0	-0.001	-0.047	-0.038	0	-0.138
TRIM28	-3.398	-1.127	-1.471	-2.964	-1.698	-0.96	-0.919	-3.172	-1.059	-1.464
TRIM33	-0.065	-3.485	-0.127	-0.126	-0.004	-0.331	-0.309	-0.03	-0.012	0
TRIM66	0	-0.019	-0.202	-0.005	-0.004	-0.12	-0.091	-0.085	-0.009	-0.043
TTF2	-4.361	-3.388	-3.457	-3.293	-4.285	-3.475	-2.493	-4.107	-5.05	-4.936
UTY	-0.001	-0.007	-0.013	-0.119	-0.036	0	-0.004	-0.003	-0.043	-0.016
ZMYND11	-0.079	-0.004	-0.004	-0.005	-0.067	-0.001	-0.202	-0.003	-0.143	-0.036
ZMYND8	-0.7	-0.091	-0.018	-1.486	-0.017	-0.062	-1.07	-0.081	-1.165	-0.026
